# Supplementary material
Source: PubMed Central journal article supplement (PMC3916881)
Supplement: supp_blood-2013-11-540781_blood-2013-11-540781-1.pdf [file supp_blood-2013-11-540781_blood-2013-11-540781-1.pdf]

Table S1: Frequency of PF4/heparin-specific B cells in normal human PBMCs

| Donors                                                           | #1  | #2  | #3  | #4  | #5  | #6  | #7  | #8  | #9  | #10 | #11 | #12 | #13 | #14 | #15 | #16 |
|------------------------------------------------------------------|-----|-----|-----|-----|-----|-----|-----|-----|-----|-----|-----|-----|-----|-----|-----|-----|
| B cell percentage in PBMCs                                       | 8.6 | 1.3 | 4.4 | 8.5 | 8.8 | 4.5 | 2.3 | 3.4 | 2.7 | 2.7 | 4.5 | 3.5 | 1.4 | 5.4 | 5.1 | 4.9 |
| Number of PF4/heparin-specific B cells per thousand PBMC B cells | 1.0 | 0.4 | 0.3 | 0.6 | 0.5 | 0.2 | 0.3 | 1.0 | 0.1 | 0.5 | 0.2 | 0.4 | 0.7 | 0.4 | 0.3 | 0.8 |

The frequency of B cells in human PBMCs that produce PF4/heparin-specific antibodies was estimated by the MPN analysis of limiting dilution 96-well cultures containing a 5-fold serial dilution of PBMCs. PBMCs ( $1 \times 10^5$  or  $2 \times 10^4$ ) from normal donor were cultured in 0.2 ml of RPMI 1640 containing 10% FBS, 1% sodium pyruvate, 1% nonessential amino acids, 0.5% L-glutamine, 50  $\mu$ M 2-mercaptoethanol, 100 U/ml penicillin, and 100  $\mu$ g/ml streptomycin in 96-well round-bottomed microplates. For polyclonal activation of B cells, the cells were stimulated with CpG (3  $\mu$ g/ml), Zysorbin (1:10,000 dilutions), and Lectin (100 ng/ml) from pokeweed. The percentage of B cells in the PBMCs was determined by FACS analysis after CD19 staining and the number of B cells in each well was calculated. Twenty four to 36 wells were set up for each dilution of PBMCs from an individual donor. After 6-7 days of culture, supernatants were collected and tested for PF4/heparin-specific antibody production. For the MPN estimation, one assumption is that whenever a well has one or more PF4/heparin-specific B cells among the PBMCs, PF4/heparin antibodies produced in this well upon *in vitro* stimulation can be detected by the ELISA assay. With this assumption, the minimum frequency of PF4/heparin-specific B cells in PBMCs was calculated by the binomial theorem. Based on the theorem, the formula for calculating the minimum frequency of PF4/heparin-specific B cells in human PBMC B cells is:  $P = 1 - (1 - X)^{1/N}$ . In this formula, P is the frequency of PF4/heparin-specific B cells in human PBMC B cells, X is the fraction of 24 or 36 wells with the same dilution of PBMCs that tested positive for PF4/heparin-specific antibodies, and N is the number of B cells in each well.
